# Supplementary material for: Anisotropy of thermal transport in phosphorene: a comparative first-principles study using different exchange–correlation functionals
Source: Royal Society of Chemistry journal article supplement (doi:10.1039/d2ma00407k), 2022-01-01
Supplement: d2ma00407k1.pdf [file d2ma00407k1.pdf]

## Supporting information

### Anisotropy of thermal transport in phosphorene: A comparative first-principles study using different exchange-correlation functional

Fa Zhang<sup>1,2</sup>, Xiong Zheng<sup>2</sup>, Huimin Wang<sup>3</sup>, Liang Ding<sup>1\*</sup>, Guangzhao Qin<sup>2\*</sup>

<sup>1</sup> *State Key Laboratory of Robotics and System, Harbin Institute of Technology, Harbin 150001, People's Republic of China.*

<sup>2</sup> *State Key Laboratory of Advanced Design and Manufacturing for Vehicle Body, College of Mechanical and Vehicle Engineering, Hunan University, 410082 Changsha, P. R. China.*

<sup>3</sup> *Hunan Key Laboratory for Micro-Nano Energy Materials & Device and School of Physics and Optoelectronics, Xiangtan University, Xiangtan 411105, Hunan, China.*

*\*Email: liangding@hit.edu.cn; gzqin@hnu.edu.cn*

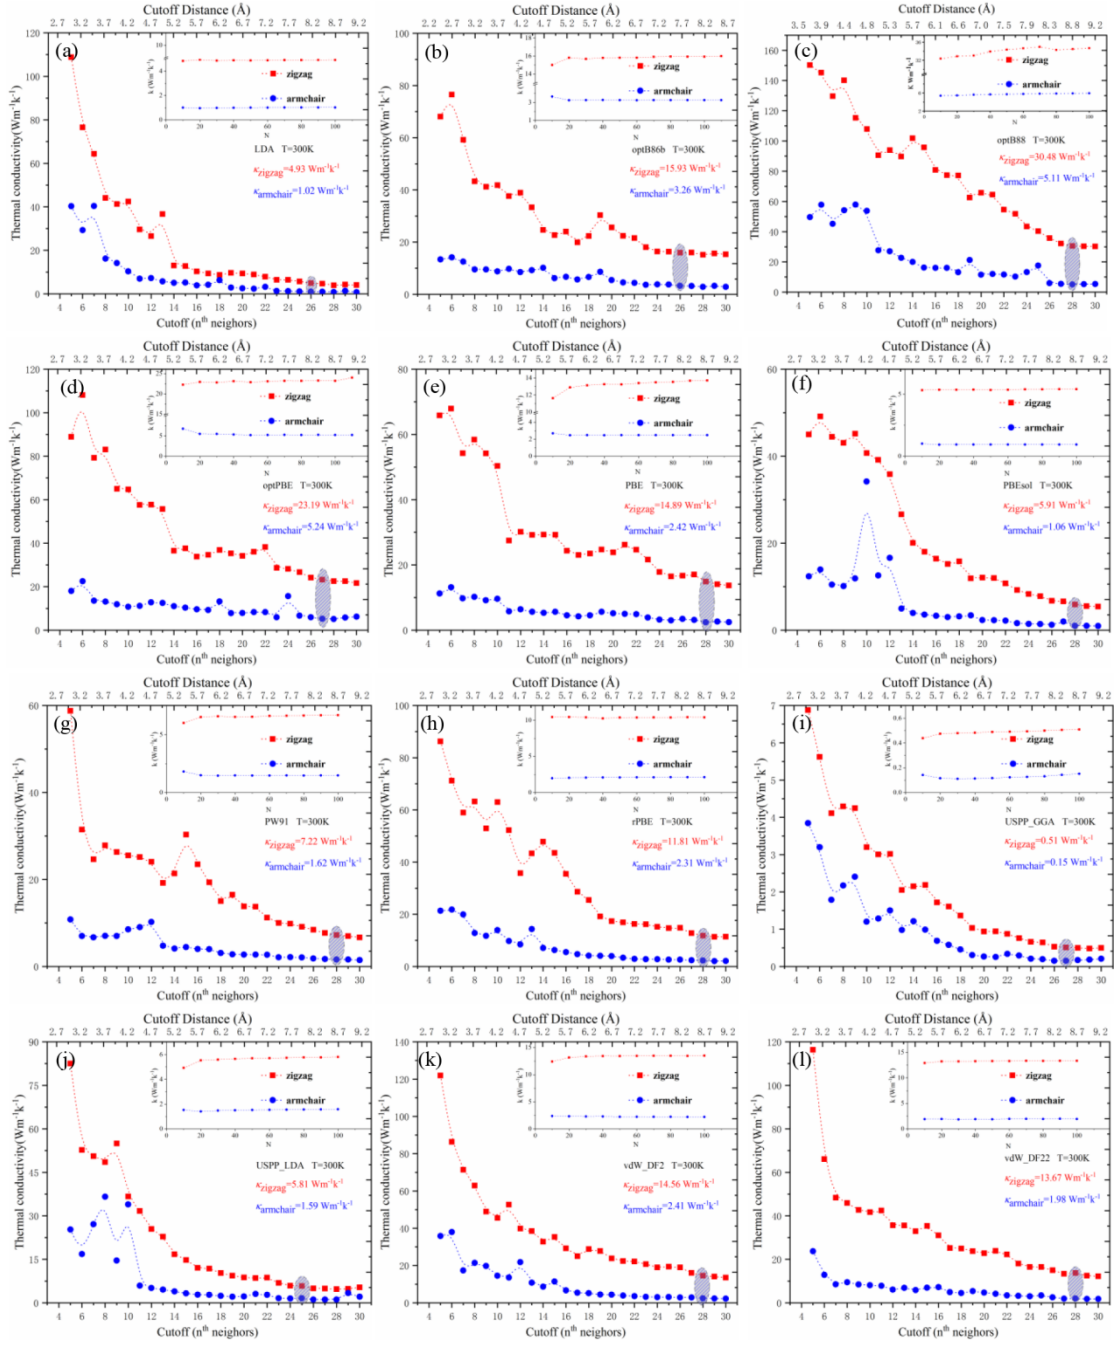

**Fig. S1.** Different XC functionals calculate the cut-off radius and the convergence behavior of Q lattice to the thermal conductivity of phosphorus lattice ( $\kappa$ )

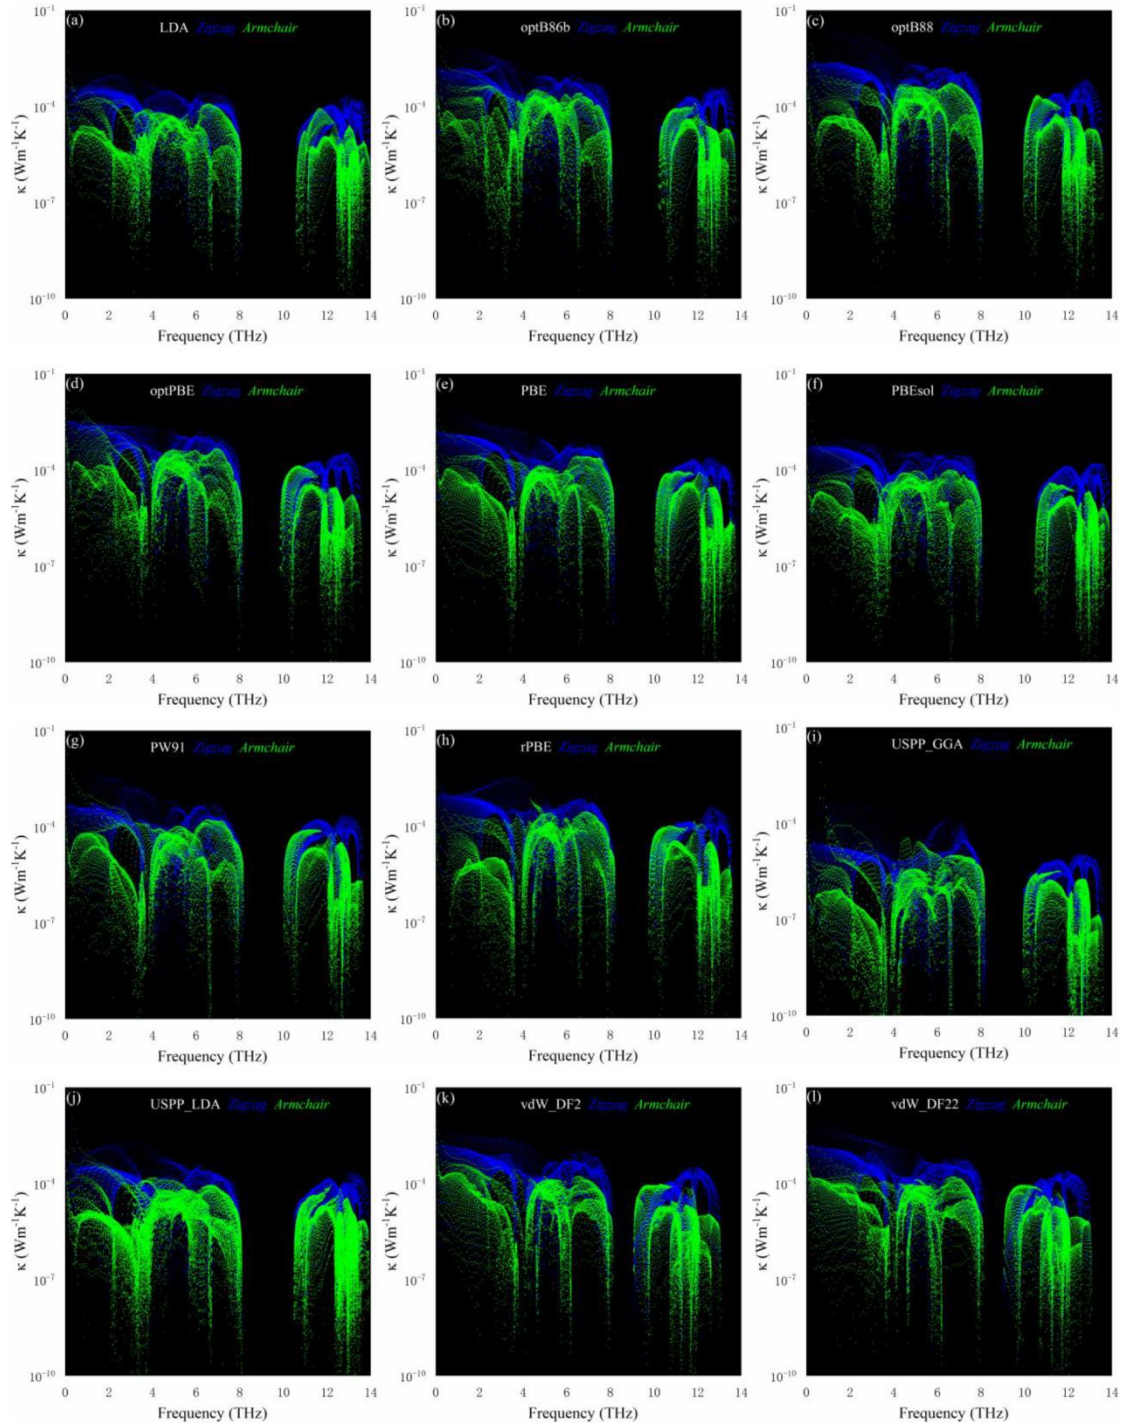

**Fig. S2.** The relationship between phonon frequency and thermal conductivity under 300K using different XC functionals

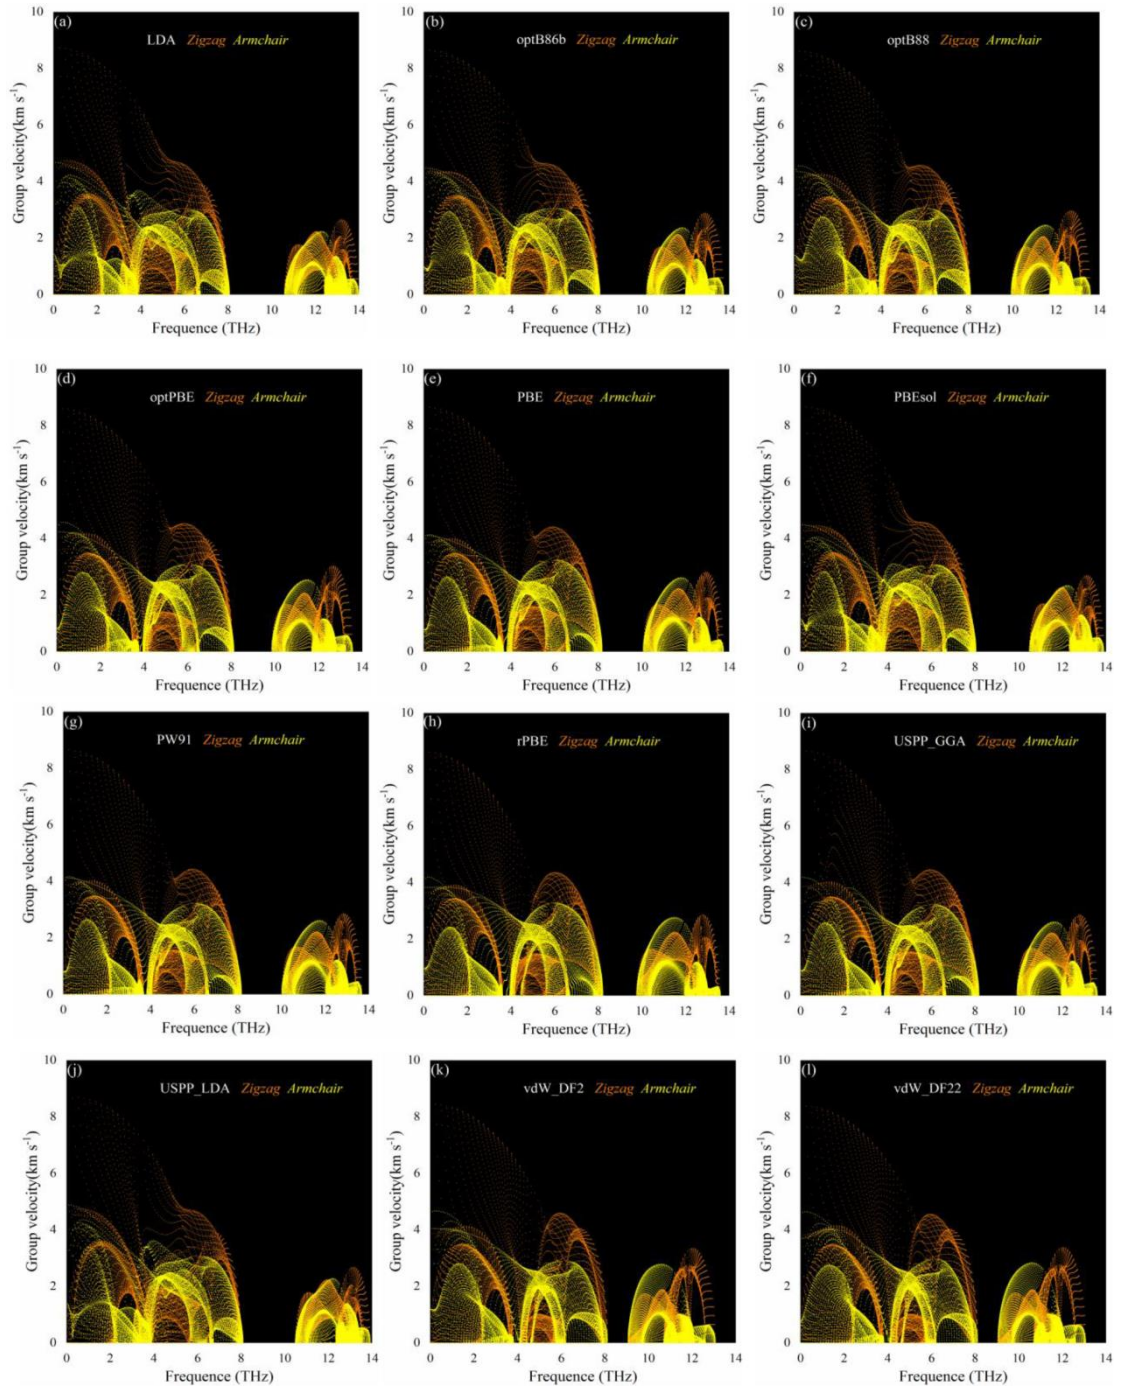

**Fig. S3.** The relationship between phonon frequency and group velocity under 300K using different XC functionals

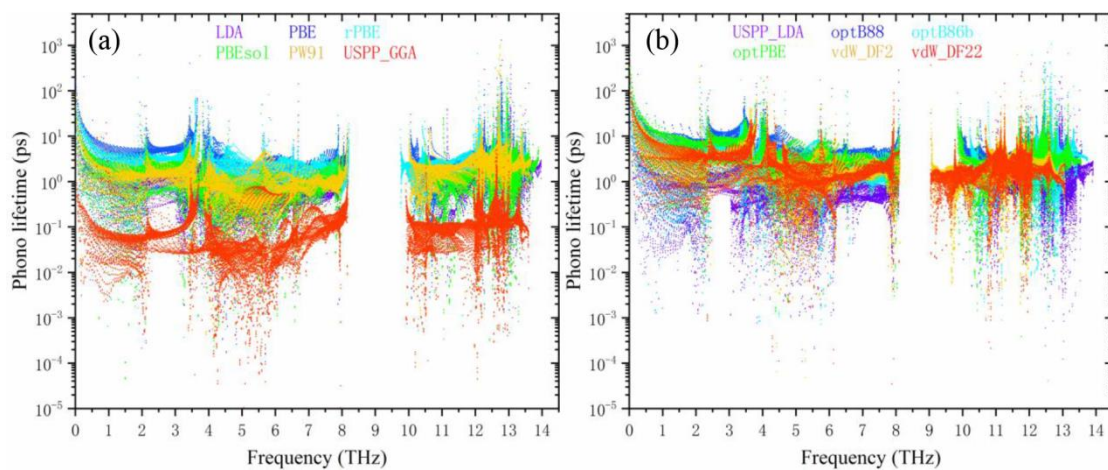

**Fig. S4.** The relationship between phonon frequency and phono lifetime under 300K using different XC functionals



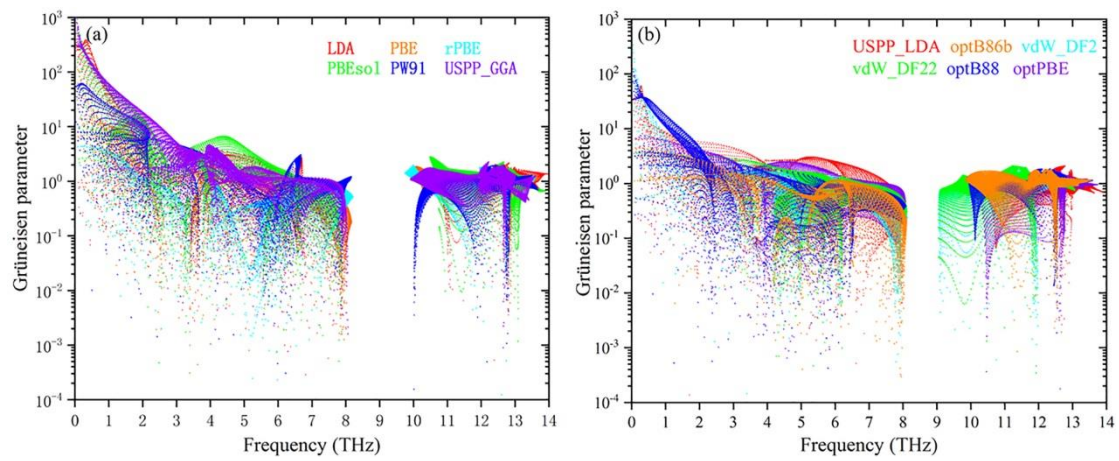

**Fig. S5.** The relationship between phonon frequency and Gruneisen parameter under 300K using different XC functionals

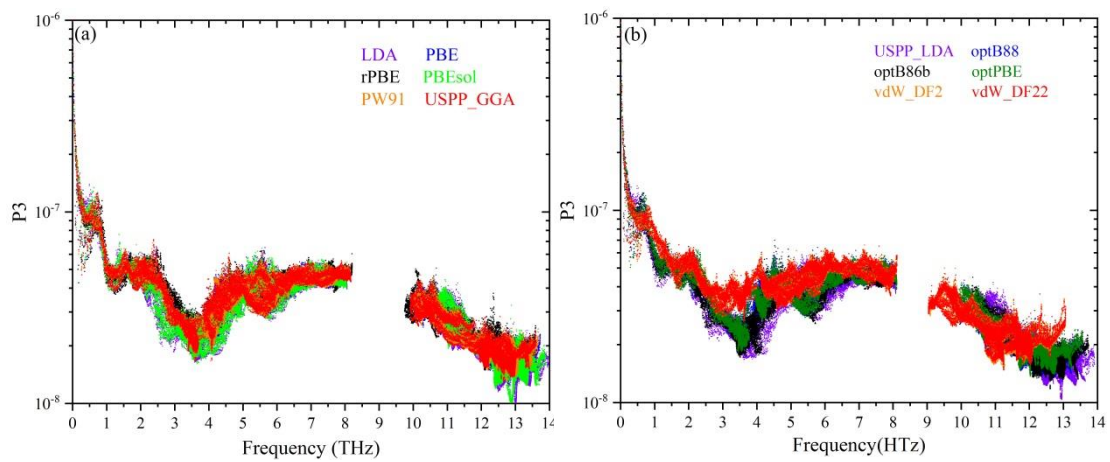

**Fig. S6.** The relationship between phonon frequency and Scattering phase space (P3) under 300K using different XC functionals
